# Supplementary material for: Conductive composite fibres from reduced graphene oxide and polypyrrole nanoparticles
Source: Royal Society of Chemistry journal article supplement (doi:10.1039/c5tb02130h), 2016-01-01
Supplement: c5tb02130h1.pdf [file c5tb02130h1.pdf]

ARTICLE

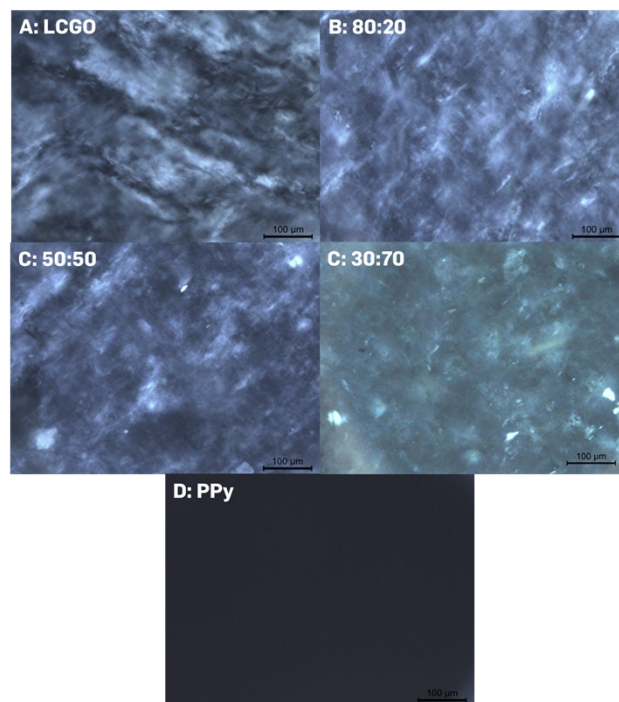

Figure S1: Polarized optical Microscope (POM) images of spinning solution of rGO, PPy and their composites (rGO:PPy).

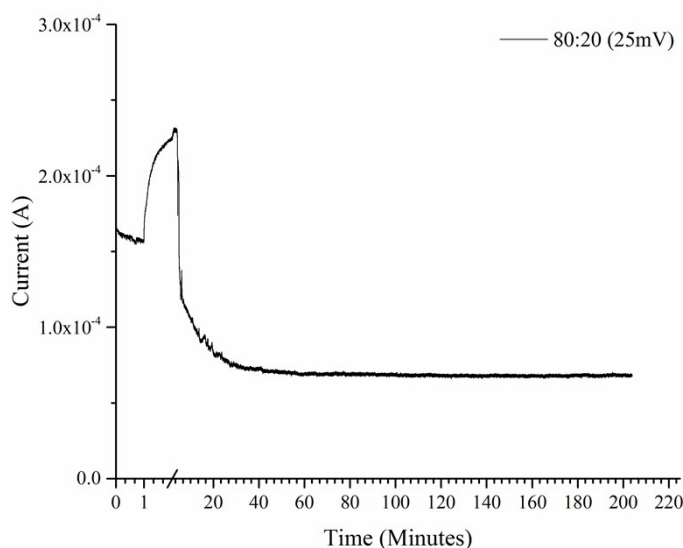

Figure S2: Change in current over time upon application of 25 mV along a dry 1 cm length of 80:20 composite fibre. After the addition of 100  $\mu$ l of PBS at 2 minutes the current increased briefly, before stabilizing at 40% of the original current, indicating a decrease in conductivity upon hydration that stabilised after 20 minutes.

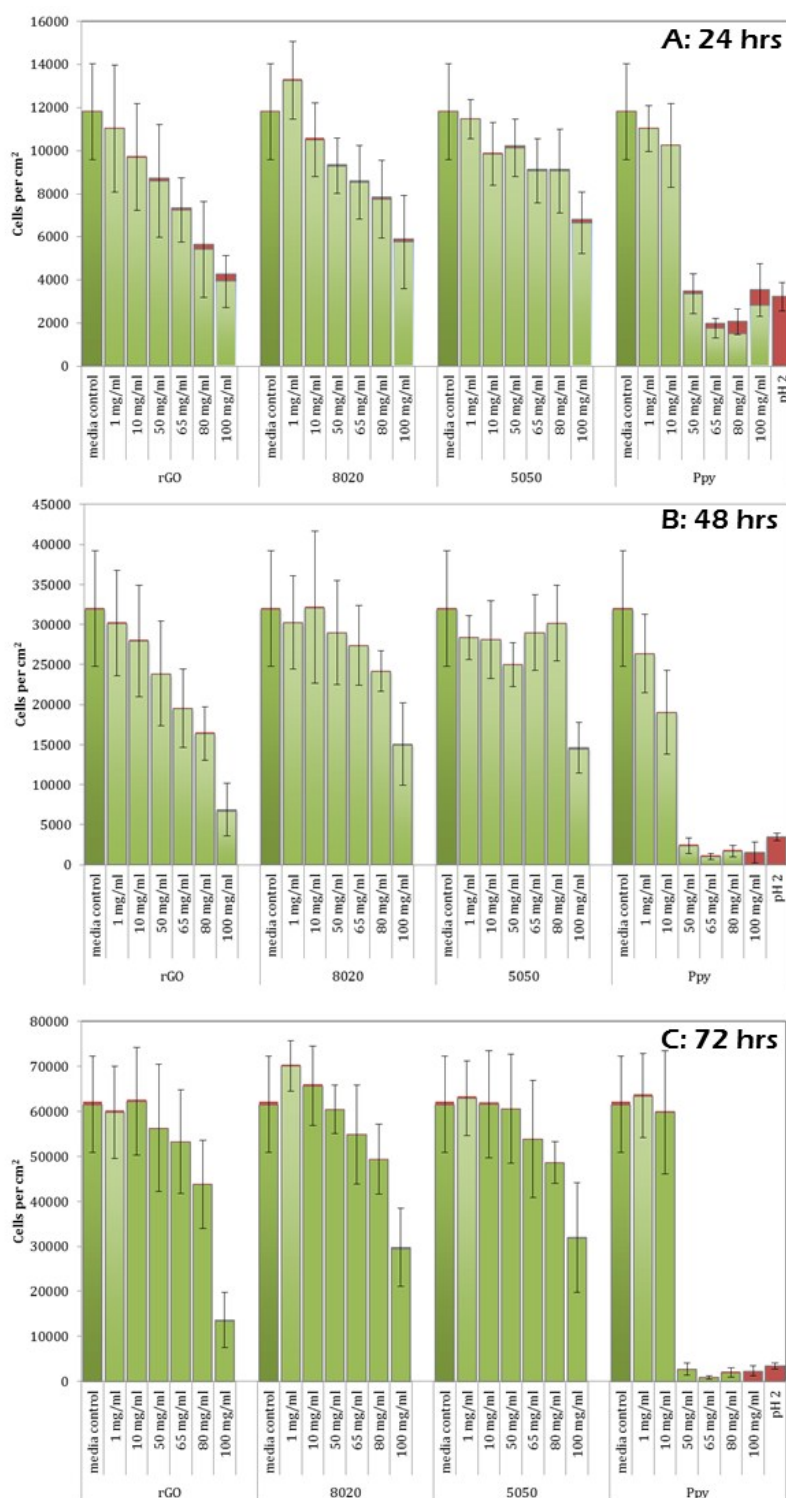

Figure S3: Live (green)/dead (red) cell counts of L929 cells after being exposed to conditioned media at different concentrations over 1 (A), 2 (B) or 3 (C) days
